# Supplementary material
Source: PubMed Central journal article supplement (PMC8357461)
Supplement: mmc1.pdf [file mmc1.pdf]

# THE LANCET

## **Supplementary appendix**

This appendix formed part of the original submission. We post it as supplied by the authors.

Supplement to: Kalafat E, Magee LA, von Dadelszen P, O'Brien P, Khalil A. SARS-CoV-2 vaccination in pregnancy: a unique opportunity for equity. *Lancet* 2021; published online Aug 11. [http://dx.doi.org/10.1016/S0140-6736\(21\)01756-6](http://dx.doi.org/10.1016/S0140-6736(21)01756-6).

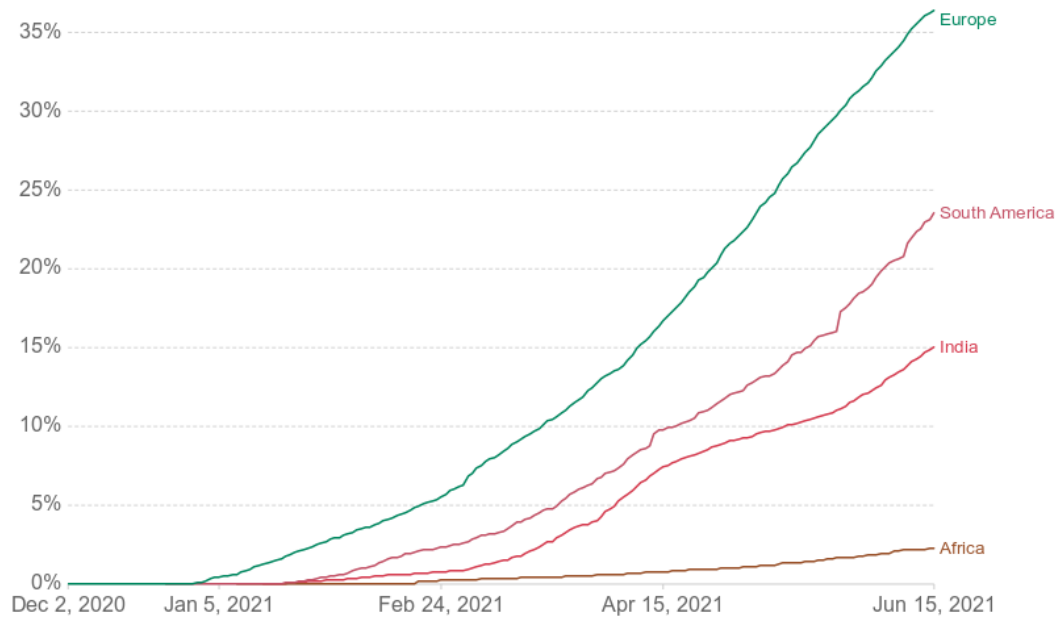

Source: Official data collated by Our World In Data

CC BY

**Figure 1.** Proportion of people who have received at least one dose of the COVID-19 vaccine.

Source: Our World in Data. <https://ourworldindata.org/covid-vaccinations>
